# Supplementary material for: Marine Heatwaves in Siberian Arctic Seas and Adjacent Region
Source: MDPI journal article supplement (doi:10.3390/rs13214436), 2021-11-04
Supplement: s1 [file s1]

Archive with 1 entries (1 files):
- remotesensing-1408636-supplementary.pdf
